# Supplementary material for: Recognition of Ultrasound Artifact Mimicking Pulmonary Artery Dissection in Patients with Heart Disease
Source: Biomed Res Int. 2019 Jun 19;2019:4919416. doi: 10.1155/2019/4919416 (PMC6607705; doi:10.1155/2019/4919416)
Supplement: Supplementary Materials — A clear diagonal line was seen in the main pulmonary artery in a 5-year-old boy diagnosed with PDA. CDFI show a linear artifact but do not interrupt blood flow in the same case. A linear artifact can be seen in a 38-year-old woman diagnosed with systemic lupus erythematosus and PAH. [file 4919416.f1.zip]

Archive with 7 entries (6 files):
- clips1-1.mp4
- clips1-2.mp4
- clips2.mp4
- __MACOSX/
- __MACOSX/._clips1-1.mp4
- __MACOSX/._clips1-2.mp4
- __MACOSX/._clips2.mp4
